# Supplementary material for: The Combination of Abscisic Acid (ABA) and Water Stress Regulates the Epicuticular Wax Metabolism and Cuticle Properties of Detached Citrus Fruit
Source: MDPI journal article supplement (doi:10.3390/ijms221910242), 2021-09-23
Supplement: s1 [file s1]

**Table S1.** Primers used for gene expression analyses.

| Citrus ID         | Short name         | Forward Sequence (5' - 3') | Reverse Sequence (5' - 3')  |
|-------------------|--------------------|----------------------------|-----------------------------|
| orange1.1g024218m | <i>CsCD2</i>       | GGCGTATTGCCAACATTCTT       | CCTCACGCTCAAAAGTCTCC        |
| orange1.1g043337m | <i>CsCER7</i>      | GGTCGCAACCCTTTTGAATA       | GGATCAGCCATTGGAGAGAA        |
| orange1.1g006768m | <i>CsCER3</i>      | CGGGGAGTCGATTTCAGCA        | TAATGTTGCATGCCAGCTG         |
| orange1.1g008315m | <i>CsCER4/FAR3</i> | GACAACAAAAGGCAGTCGGAC      | ACAAATTGGTGCTGGGCCTA        |
| orange1.1g015087m | <i>CsSQS</i>       | AGTCAAAATGAGGCGTGGACT      | TACTTGCTTGCTCGGGTGG         |
| orange1.1g011007m | <i>CsCER6/KCS6</i> | ACTTCATGTCCAAGCCAAGG       | GCAGGTCTCTTCACCGAGTC        |
| orange1.1g005142m | <i>CsWBC11</i>     | GATTTCTACAAACTTCTCAGCACTCG | ATTGTAACCAGTTCACGTTTCAGAT   |
| orange1.1g046969m | <i>CsWBC12</i>     | AGCAAAGTTGGCTGTGGAGT       | TCTCAGCTGTTGCCATGTTT        |
| orange1.1g013062m | <i>CsACT</i>       | TTAACCCCAAGGCCAACAGA       | TCCCTCATAGATTGGTACAGTATGAGA |
| orange1.1g013062m | <i>CsTUB</i>       | GCATCTTGAACCCGGTAC         | ATCAATTCGGCGCCTTCAG         |
